# Supplementary material
Source: publisher figshare collection journal article supplement (https://karger.figshare.com/articles/dataset/_/5122729)
Supplement: Supplementary file 1 [file 1]

**Table S1-1** The effects of NGB2904 and SCH23390 pretreatment on cocaine-induced dendritic complexity revealed by Sholl analysis in NAc and CPu

| Distance from<br>soma( $\mu m$ ) | Group             | Mean $\pm$ S.E.M  | $^ap$   | $F_{(3,188)}$ | $P$     |
|----------------------------------|-------------------|-------------------|---------|---------------|---------|
| NAc                              |                   |                   |         |               |         |
| 20                               | Saline/Saline     | 7.67 $\pm$ 0.285  | 0.607   | 3.005         | 0.032   |
|                                  | Saline/Cocaine    | 7.46 $\pm$ 0.276  | -       |               |         |
|                                  | NGB2904/ Cocaine  | 8.50 $\pm$ 0.301  | 0.011   |               |         |
|                                  | SCH23390/ Cocaine | 7.461 $\pm$ .957  | 1.000   |               |         |
| 40                               | Saline/Saline     | 7.83 $\pm$ 0.258  | 0.006   | 29.080        | P<0.001 |
|                                  | Saline/Cocaine    | 9.54 $\pm$ 0.394  | -       |               |         |
|                                  | NGB2904/ Cocaine  | 10.38 $\pm$ 0.315 | 0.015   |               |         |
|                                  | SCH23390/ Cocaine | 7.38 $\pm$ 0.222  | P<0.001 |               |         |
| 60                               | Saline/Saline     | 5.13 $\pm$ 0.309  | P<0.001 | 37.827        | P<0.001 |
|                                  | Saline/Cocaine    | 7.31 $\pm$ 0.255  | -       |               |         |
|                                  | NGB2904/ Cocaine  | 8.40 $\pm$ 0.406  | 0.012   |               |         |
|                                  | SCH23390/ Cocaine | 4.17 $\pm$ 0.346  | P<0.001 |               |         |
| 80                               | Saline/Saline     | 1.94 $\pm$ 0.201  | P<0.001 | 37.527        | P<0.001 |
|                                  | Saline/Cocaine    | 4.40 $\pm$ 0.334  | -       |               |         |
|                                  | NGB2904/ Cocaine  | 5.13 $\pm$ 0.274  | 0.050   |               |         |
|                                  | SCH23390/ Cocaine | 2.13 $\pm$ 0.247  | P<0.001 |               |         |
| 100                              | Saline/Saline     | 0.92 $\pm$ 0.168  | P<0.001 | 13.793        | P<0.001 |
|                                  | Saline/Cocaine    | 2.23 $\pm$ 0.239  | -       |               |         |
|                                  | NGB2904/ Cocaine  | 2.48 $\pm$ 0.176  | 1.000   |               |         |
|                                  | SCH23390/ Cocaine | 1.25 $\pm$ 0.220  | P<0.005 |               |         |
| 120                              | Saline/Saline/    | 0.21 $\pm$ 0.094  | P<0.001 | 13.846        | P<0.001 |
|                                  | Saline//Cocaine   | 1.06 $\pm$ 0.131  | -       |               |         |
|                                  | NGB2904/ Cocaine  | 1.04 $\pm$ 0.111  | 1.000   |               |         |
|                                  | SCH23390/ Cocaine | 0.29 $\pm$ 0.155  | P<0.001 |               |         |
| CPu                              |                   |                   |         |               |         |
| 20                               | Saline/Saline     | 8.96 $\pm$ 0.271  | 1.000   | 5.671         | P=0.001 |
|                                  | Saline/Cocaine    | 9.5 $\pm$ 0.357   | -       |               |         |
|                                  | NGB2904/ Cocaine  | 10.08 $\pm$ 0.300 | 1.000   |               |         |
|                                  | SCH23390/ Cocaine | 8.40 $\pm$ 0.279  | 0.066   |               |         |

|     |                   |                |         |        |         |
|-----|-------------------|----------------|---------|--------|---------|
| 40  | Saline/Saline     | 10.83 ± 408    | 0.006   | 30.225 | P<0.001 |
|     | Saline/Cocaine    | 12.75 ± 0. 549 | -       |        |         |
|     | NGB2904/ Cocaine  | 14.79 ± 0. 331 | 0.003   |        |         |
|     | SCH23390/ Cocaine | 9.71 ± 0. 287  | P<0.001 |        |         |
| 60  | Saline/Saline     | 7.00 ± 0. 513  | P<0.001 | 34.011 | P<0.001 |
|     | Saline/Cocaine    | 10.46 ± 0. 562 | -       |        |         |
|     | NGB2904/ Cocaine  | 11.79 ± 0. 345 | 0.032   |        |         |
|     | SCH23390/ Cocaine | 6.67 ± 0. 248  | P<0.001 |        |         |
| 80  | Saline/Saline     | 3.71 ± 0. 314  | P<0.001 | 31.674 | P<0.001 |
|     | Saline/Cocaine    | 6.71 ± 0. 717  | -       |        |         |
|     | NGB2904/ Cocaine  | 8.35 ± 0.239   | 0.040   |        |         |
|     | SCH23390/ Cocaine | 9.42 ± 0. 228  | P<0.001 |        |         |
| 100 | Saline/Saline     | 1.67 ± 0. 244  | P<0.001 | 19.258 | P<0.001 |
|     | Saline/Cocaine    | 3.75 ± 0. 533  | -       |        |         |
|     | NGB2904/ Cocaine  | 4.79 ± 0. 295  | 0.038   |        |         |
|     | SCH23390/ Cocaine | 1.67 ± 0. 227  | P<0.001 |        |         |
| 120 | Saline/Saline/    | 0.54 ± 0. 146  | P<0.001 | 18.108 | P<0.001 |
|     | Saline//Cocaine   | 1.88 ± 0. 393  | -       |        |         |
|     | NGB2904/ Cocaine  | 2.79 ± 0. 177  | 0.013   |        |         |
|     | SCH23390/ Cocaine | 0.54 ± 0. 168  | P<0.001 |        |         |
| 140 | Saline/Saline     | 0.08 ± 0. 058  | 0.001   | 4.288  | 0.006   |
|     | Saline/Cocaine    | 0.62 ± 0. 187  | -       |        |         |
|     | NGB2904/ Cocaine  | 0.38 ± 0. 092  | 0.362   |        |         |
|     | SCH23390/ Cocaine | 0.27 ± 0. 093  | 0.111   |        |         |
| 160 | Saline/Saline     | 0.04 ± 0. 029  | 1.000   | 1.635  | 0.183   |
|     | Saline/Cocaine    | 0.00 ± 0. 000  | -       |        |         |
|     | NGB2904/ Cocaine  | 0.13 ± 0. 087  | 0.340   |        |         |
|     | SCH23390/ Cocaine | 0.04 ± 0. 023  | 1.000   |        |         |

<sup>a</sup>*p*, compared with cocaine-treated group, bonferroni's test.

Significant levels were set at p<0.05.

**Table S1-2** The effects of MK801 pretreatment on cocaine-induced dendritic complexity revealed by Sholl analysis in NAc and CPu

| Distance from<br>soma( $\mu m$ ) | Group          | Mean $\pm$ S.E.M  | $^ap$   | $F_{(2,141)}$ | $P$     |
|----------------------------------|----------------|-------------------|---------|---------------|---------|
| NAc                              |                |                   |         |               |         |
| 20                               | Saline/Saline  | 7.67 $\pm$ 0.285  | 0.588   | 4.787         | 0.010   |
|                                  | Saline/Cocaine | 7.46 $\pm$ 0.276  | -       |               |         |
|                                  | MK801/ Cocaine | 6.54 $\pm$ 0.259  | 0.021   |               |         |
| 40                               | Saline/Saline  | 7.83 $\pm$ 0.258  | 0.001   | 10.095        | P<0.001 |
|                                  | Saline/Cocaine | 9.54 $\pm$ 0.394  | -       |               |         |
|                                  | MK801/ Cocaine | 7.75 $\pm$ 0.286  | P<0.001 |               |         |
| 60                               | Saline/Saline  | 5.13 $\pm$ 0.309  | P<0.001 | 26.549        | P<0.001 |
|                                  | Saline/Cocaine | 7.31 $\pm$ 0.255  | -       |               |         |
|                                  | MK801/ Cocaine | 4.63 $\pm$ 0.266  | P<0.001 |               |         |
| 80                               | Saline/Saline  | 1.94 $\pm$ 0.201  | P<0.001 | 42.205        | P<0.001 |
|                                  | Saline/Cocaine | 4.40 $\pm$ 0.334  | -       |               |         |
|                                  | MK801/ Cocaine | 1.44 $\pm$ 0.163  | P<0.001 |               |         |
| 100                              | Saline/Saline  | 0.92 $\pm$ 0.168  | P<0.001 | 44.218        | P<0.001 |
|                                  | Saline/Cocaine | 2.23 $\pm$ 0.239  | -       |               |         |
|                                  | MK801/ Cocaine | 0.00 $\pm$ 0.000  | P<0.001 |               |         |
| 120                              | Saline/Saline  | 0.21 $\pm$ 0.094  | P<0.001 | 36.530        | P<0.001 |
|                                  | Saline/Cocaine | 1.06 $\pm$ 0.131  | -       |               |         |
|                                  | MK801/ Cocaine | 0.00 $\pm$ 0.000  | P<0.001 |               |         |
| CPu                              |                |                   |         |               |         |
| 20                               | Saline/Saline  | 8.96 $\pm$ 0.271  | 0.548   | 14.285        | P<0.001 |
|                                  | Saline/Cocaine | 9.5 $\pm$ 0.357   | -       |               |         |
|                                  | MK801/ Cocaine | 7.42 $\pm$ 0.210  | P<0.001 |               |         |
| 40                               | Saline/Saline  | 10.83 $\pm$ 408   | 0.006   | 13.565        | P<0.001 |
|                                  | Saline/Cocaine | 12.75 $\pm$ 0.549 | -       |               |         |
|                                  | MK801/ Cocaine | 9.63 $\pm$ 0.285  | P<0.001 |               |         |
| 60                               | Saline/Saline  | 7.00 $\pm$ 0.513  | P<0.001 | 14.663        | P<0.001 |
|                                  | Saline/Cocaine | 10.46 $\pm$ 0.562 | -       |               |         |
|                                  | MK801/ Cocaine | 8.00 $\pm$ 0.263  | 0.001   |               |         |

|     |                |                  |             |        |             |
|-----|----------------|------------------|-------------|--------|-------------|
| 80  | Saline/Saline  | $3.71 \pm 0.314$ | $P < 0.001$ | 11.736 | $P < 0.001$ |
|     | Saline/Cocaine | $6.71 \pm 0.717$ | -           |        |             |
|     | MK801/ Cocaine | $4.21 \pm 0.219$ | 0.001       |        |             |
| 100 | Saline/Saline  | $1.67 \pm 0.244$ | $P < 0.001$ | 8.602  | $P < 0.001$ |
|     | Saline/Cocaine | $3.75 \pm 0.533$ | -           |        |             |
|     | MK801/ Cocaine | $2.38 \pm 0.218$ | 0.024       |        |             |
| 120 | Saline/Saline  | $0.54 \pm 0.146$ | 0.001       | 8.498  | $P < 0.001$ |
|     | Saline/Cocaine | $1.88 \pm 0.393$ | -           |        |             |
|     | MK801/ Cocaine | $0.67 \pm 0.124$ | 0.003       |        |             |
| 140 | Saline/Saline  | $0.08 \pm 0.058$ | 0.001       | 5.926  | 0.003       |
|     | Saline/Cocaine | $0.62 \pm 0.187$ | -           |        |             |
|     | MK801/ Cocaine | $0.31 \pm 0.074$ | 0.120       |        |             |
| 160 | Saline/Saline  | $0.04 \pm 0.029$ | 0.246       | 2.043  | 0.133       |
|     | Saline/Cocaine | $0.00 \pm 0.000$ | -           |        |             |
|     | MK801/ Cocaine | $0.00 \pm 0.000$ | 1.000       |        |             |

<sup>a</sup>*p*, compared with cocaine-treated group, bonferroni's test

Significant levels were set at  $p < 0.05$ .

**Table S1-3** The effects of SL327 pretreatment on cocaine-induced dendritic complexity revealed by Sholl analysis in NAc and CPu

| Distance from<br>soma( $\mu m$ ) | Group             | Mean $\pm$ S.E.M   | <sup>a</sup> <i>p</i> | <i>F</i> <sub>(2,141)</sub> | <i>P</i> |
|----------------------------------|-------------------|--------------------|-----------------------|-----------------------------|----------|
| NAc                              |                   |                    |                       |                             |          |
| 20                               | Saline/Saline     | 7. 67 $\pm$ 0. 285 | 1.000                 | 0.604                       | 0.548    |
|                                  | Saline/Cocaine    | 7.46 $\pm$ 0. 276  | -                     |                             |          |
|                                  | SL327/ Cocaine    | 7.92 $\pm$ 0. 323  | 0.823                 |                             |          |
| 40                               | Saline/Saline     | 7.83 $\pm$ 0. 258  | 0.002                 | 6.199                       | 0.003    |
|                                  | Saline/Cocaine    | 9.54 $\pm$ 0. 394  | -                     |                             |          |
|                                  | SL327/ Cocaine    | 8.77 $\pm$ 0. 364  | 0.167                 |                             |          |
| 60                               | Saline/Saline     | 5.13 $\pm$ 0. 309  | P<0.001               | 13.127                      | P<0.001  |
|                                  | Saline/Cocaine    | 7.31 $\pm$ 0. 255  | -                     |                             |          |
|                                  | SL327/ Cocaine    | 5.94 $\pm$ 0. 345  | 0.005                 |                             |          |
| 80                               | Saline/Saline     | 1.94 $\pm$ 0. 201  | P<0.001               | 20.791                      | P<0.001  |
|                                  | Saline/Cocaine    | 4.40 $\pm$ 0. 334  | -                     |                             |          |
|                                  | SL327/ Cocaine    | 2.54 $\pm$ 0. 292  | P<0.001               |                             |          |
| 100                              | Saline/Saline     | 0.92 $\pm$ 0. 168  | P<0.001               | 19.166                      | P<0.001  |
|                                  | Saline/Cocaine    | 2.23 $\pm$ 0. 239  | -                     |                             |          |
|                                  | SL327/ Cocaine    | 0.71 $\pm$ 0. 146  | P<0.001               |                             |          |
| 120                              | Saline/Saline     | 0.21 $\pm$ 0. 094  | P<0.001               | 21.289                      | P<0.001  |
|                                  | Saline/Cocaine    | 1.06 $\pm$ 0. 131  | -                     |                             |          |
|                                  | SL327/ Cocaine    | 0.25 $\pm$ 0. 082  | P<0.001               |                             |          |
| CPu                              |                   |                    |                       |                             |          |
| 20                               | 8.96 $\pm$ 0. 271 | 0.571              | 8.96 $\pm$ 0. 271     | 8.765                       | P<0.001  |
|                                  | 9.5 $\pm$ 0. 357  | -                  | 9.5 $\pm$ 0. 357      |                             |          |
|                                  | 7.81 $\pm$ 0. 230 | P<0.001            | 7.81 $\pm$ 0. 230     |                             |          |
| 40                               | Saline/Saline     | 10.83 $\pm$ 408    | 0.013                 | 5.191                       | 0.007    |
|                                  | Saline/Cocaine    | 12.75 $\pm$ 0. 549 | -                     |                             |          |
|                                  | SL327/ Cocaine    | 11.00 $\pm$ 0. 428 | 0.026                 |                             |          |
| 60                               | Saline/Saline     | 7.00 $\pm$ 0. 513  | P<0.001               | 12.670                      | P<0.001  |
|                                  | Saline/Cocaine    | 10.46 $\pm$ 0. 562 | -                     |                             |          |
|                                  | SL327/ Cocaine    | 8.79 $\pm$ 0. 385  | 0.050                 |                             |          |

|     |                |                  |             |       |             |
|-----|----------------|------------------|-------------|-------|-------------|
| 80  | Saline/Saline  | $3.71 \pm 0.314$ | $P < 0.001$ | 9.581 | $P < 0.001$ |
|     | Saline/Cocaine | $6.71 \pm 0.717$ | -           |       |             |
|     | SL327/ Cocaine | $4.83 \pm 0.327$ | 0.023       |       |             |
| 100 | Saline/Saline  | $1.67 \pm 0.244$ | $P < 0.001$ | 9.421 | $P < 0.001$ |
|     | Saline/Cocaine | $3.75 \pm 0.533$ | -           |       |             |
|     | SL327/ Cocaine | $2.00 \pm 0.234$ | 0.003       |       |             |
| 120 | Saline/Saline  | $0.54 \pm 0.146$ | 0.002       | 7.037 | 0.001       |
|     | Saline/Cocaine | $1.88 \pm 0.393$ | -           |       |             |
|     | SL327/ Cocaine | $0.79 \pm 0.195$ | 0.014       |       |             |
| 140 | Saline/Saline  | $0.08 \pm 0.058$ | 0.002       | 5.181 | 0.007       |
|     | Saline/Cocaine | $0.62 \pm 0.187$ | -           |       |             |
|     | SL327/ Cocaine | $0.35 \pm 0.105$ | 0.261       |       |             |
| 160 | Saline/Saline  | $0.04 \pm 0.029$ | 0.246       | 2.043 | 0.133       |
|     | Saline/Cocaine | $0.00 \pm 0.000$ | -           |       |             |
|     | SL327/ Cocaine | $0.00 \pm 0.000$ | 1.000       |       |             |

<sup>a</sup>*p*, compared with cocaine-treated group, bonferroni's test

Significant levels were set at  $p < 0.05$ .

**Table S2** The effects of different dosage of NGB2904 on cocaine-induced increase of the number of dendrites and spines of MSNs

| Group                    | Mean±S.E.M  | <sup>a</sup> <i>p</i> | <sup>b</sup> <i>p</i> | <i>F</i> <sub>(5,282)</sub> | <i>P</i> |
|--------------------------|-------------|-----------------------|-----------------------|-----------------------------|----------|
| The total branches (CPu) |             |                       |                       |                             |          |
| Sal+Cocaine(Coc)         | 30.08±0.862 | -                     | 0.006                 | 12.779                      | P<0.001  |
| 0.1mg/kgNGB/Coc          | 30.71±0.735 | 1.000                 | 0.041                 |                             |          |
| 0.5mg/kgNGB/Coc          | 31.88±0.885 | 1.000                 | 0.722                 |                             |          |
| 1mg/kgNGB/Coc            | 34.10±0.823 | 0.006                 | -                     |                             |          |
| 3mg/kgNGB/Coc            | 34.75±0.765 | 0.001                 | 1.000                 |                             |          |
| 5mg/kgNGB/Coc            | 37.6±0.674  | P<0.001               | 0.03                  |                             |          |
| The total branches (NAc) |             |                       |                       |                             |          |
| Sal+Cocaine(Coc)         | 23.10±0.63  | -                     | 0.006                 | 13.806                      | P<0.001  |
| 0.1mg/kgNGB/Coc          | 23.52±0.619 | 1.000                 | 0.024                 |                             |          |
| 0.5mg/kgNGB/Coc          | 24.38±0.614 | 1.000                 | 1.000                 |                             |          |
| 1mg/kgNGB/Coc            | 26.19±0.576 | 0.006                 | -                     |                             |          |
| 3mg/kgNGB/Coc            | 27.17±0.687 | P<0.001               | 1.000                 |                             |          |
| 5mg/kgNGB/Coc            | 28.9±0.607  | P<0.001               | 0.025                 |                             |          |
| The spine density (CPu)  |             |                       |                       |                             |          |
| Sal+Cocaine(Coc)         | 12.60±0.232 | -                     | 0.009                 | 11.911                      | P<0.001  |
| 0.1mg/kgNGB/Coc          | 12.78±0.19  | 1.000                 | 0.043                 |                             |          |
| 0.5mg/kgNGB/Coc          | 13.44±0.249 | 0.435                 | 1.000                 |                             |          |
| 1mg/kgNGB/Coc            | 13.93±0.325 | 0.009                 | -                     |                             |          |
| 3mg/kgNGB/Coc            | 14.24±0.292 | P<0.001               | 1.000                 |                             |          |
| 5mg/kgNGB/Coc            | 15.09±0.318 | P<0.001               | 0.044                 |                             |          |
| The spine density (NAc)  |             |                       |                       |                             |          |
| Sal+Cocaine(Coc)         | 12.22±0.344 | -                     | 0.003                 | 13.107                      | P<0.001  |
| 0.1mg/kgNGB/Coc          | 12.51±0.359 | 1.000                 | 0.029                 |                             |          |
| 0.5mg/kgNGB/Coc          | 13.29±0.32  | 1.000                 | 0.282                 |                             |          |
| 1mg/kgNGB/Coc            | 13.96±0.313 | 0.003                 | -                     |                             |          |
| 3mg/kgNGB/Coc            | 14.18±0.315 | 0.001                 | 1.000                 |                             |          |
| 5mg/kgNGB/Coc            | 15.33±0.242 | P<0.001               | 0.045                 |                             |          |

<sup>a</sup>*p*, compared with cocaine-treated group, bonferroni's test.

<sup>b</sup>*p*, compared with 1mg/kg NGB 2904 group, bonferroni's test.

Significant levels were set at p<0.05.
